# Supplementary material for: The Raw Milk Microbiota from Semi-Subsistence Farms Characteristics by NGS Analysis Method
Source: MDPI journal article supplement (doi:10.3390/molecules26165029), 2021-08-19
Supplement: s1 [file s1]

## Supplementary materials

**Supplementary Table S1.** The results of read-filtering in sequencing data analysis

| Sample name | Number of reads | Filtered reads | Unique reads after filtering | Chimeric reads | Unique chimeric reads | Reads in OTUs |
|-------------|-----------------|----------------|------------------------------|----------------|-----------------------|---------------|
| A1          | 168 683         | 58 758         | 19 742                       | 10 229         | 834                   | 99 696        |
| A2          | 33 765          | 13 872         | 4 310                        | 876            | 120                   | 19 017        |
| A3          | 58 939          | 29 338         | 8 175                        | 1 531          | 297                   | 28 070        |
| A4          | 56 823          | 18 856         | 7 509                        | 3 980          | 358                   | 33 987        |
| A5          | 23 100          | 9 758          | 2 929                        | 638            | 86                    | 12 704        |
| A6          | 7 332           | 3 473          | 751                          | 16             | 7                     | 3 846         |
| A7          | 163 449         | 46 077         | 19 110                       | 12 619         | 540                   | 104 753       |
| A8          | 87 180          | 39 584         | 10 600                       | 1 484          | 244                   | 46 112        |
| A9          | 251 192         | 90 074         | 31 327                       | 12 301         | 1 119                 | 148 817       |
| A10         | 250 333         | 95 845         | 31 574                       | 8 828          | 1 000                 | 145 660       |
| B1          | 509 904         | 95 840         | 76 047                       | 24 053         | 2 539                 | 390 011       |
| B2          | 315 461         | 96 282         | 50 417                       | 12 631         | 2 820                 | 206 548       |
| B3          | 110 845         | 37 956         | 18 475                       | 4 093          | 919                   | 68 796        |
| B4          | 413 580         | 120 550        | 65 014                       | 24 170         | 4 607                 | 268 860       |
| B5          | 393 219         | 91 449         | 62 354                       | 27 685         | 4 817                 | 274 085       |
| B6          | 527 183         | 96 780         | 81 317                       | 27 539         | 3 110                 | 402 864       |
| B7          | 632 956         | 112 960        | 96 648                       | 29 911         | 3 899                 | 490 085       |
| B8          | 440 116         | 96 519         | 69 652                       | 18 051         | 3 184                 | 325 546       |
| B9          | 356 486         | 78 306         | 54 694                       | 15 424         | 2 167                 | 262 756       |
| B10         | 447 209         | 90 802         | 69 477                       | 25 472         | 3 127                 | 330 935       |
| C1          | 259 197         | 50 883         | 24 388                       | 34 796         | 1 146                 | 137 518       |
| C2          | 238 601         | 59 402         | 22 261                       | 29 526         | 750                   | 149 673       |
| C3          | 209 169         | 45 337         | 19 561                       | 21 336         | 639                   | 142 496       |
| C4          | 251 070         | 56 351         | 22 896                       | 34 821         | 891                   | 159 898       |
| C5          | 253 785         | 50 589         | 23 161                       | 45 686         | 1 103                 | 157 510       |
| C6          | 284 205         | 71 630         | 27 888                       | 33 327         | 1 191                 | 179 248       |
| C7          | 203 973         | 66 208         | 21 342                       | 11 428         | 612                   | 126 337       |
| C8          | 222 106         | 69 722         | 22 413                       | 18 353         | 791                   | 134 031       |
| C9          | 273 670         | 86 309         | 29 469                       | 24 196         | 1 550                 | 163 165       |
| C10         | 203 897         | 68 295         | 21 146                       | 15 977         | 676                   | 119 625       |

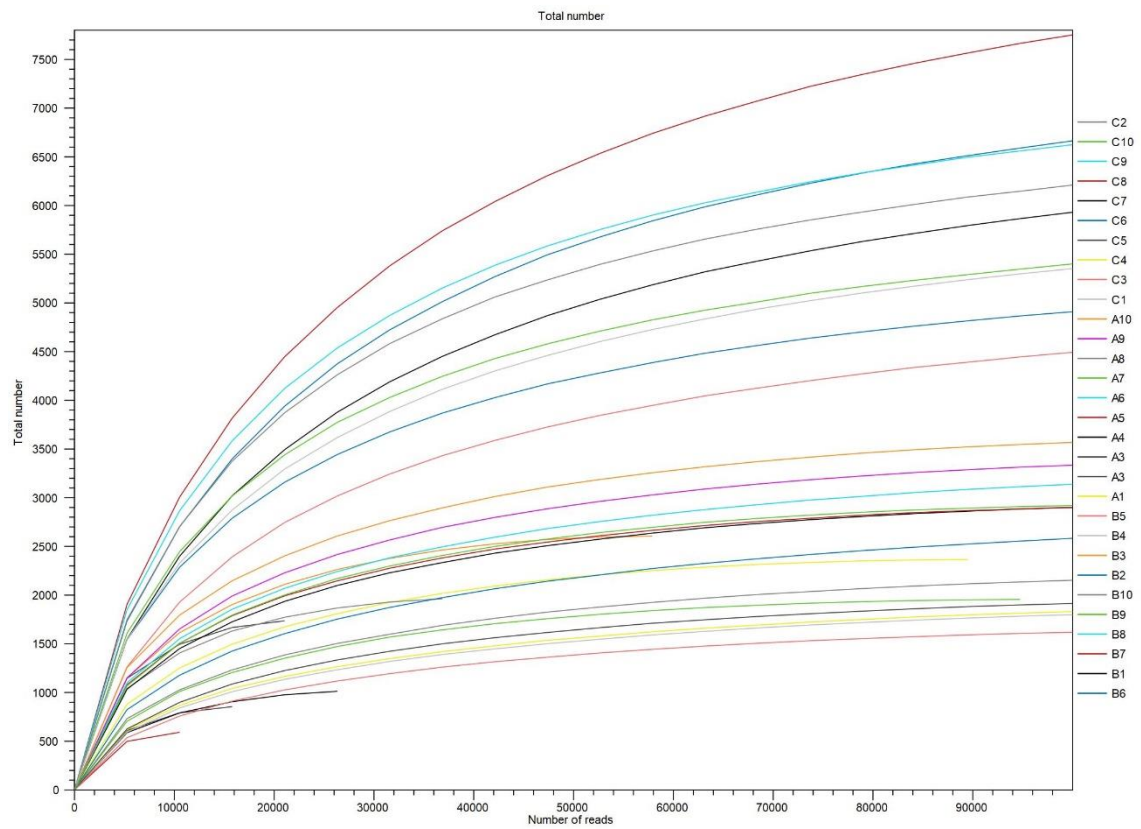

**Supplementary Figure S1.** Rarefaction curve used to calculate alpha-diversity
